# Supplementary material
Source: publisher figshare collection journal article supplement (https://tandf.figshare.com/ndownloader/files/1706256)
Supplement: Supplementary file 1 [file 1706256]

# Supporting Information

## Facile synthesis of mono- and polytopic $\beta$ -cyclodextrin aromatic aldehydes by click chemistry

Hongyu Guo<sup>1</sup>, Fafu Yang<sup>1,2\*</sup>, Yingmei Zhang<sup>1</sup>, and Xingdong Di<sup>1</sup>

<sup>1</sup>*College of Chemistry and Chemical Engineering, Fujian Normal University, Fuzhou 350007, China*

<sup>2</sup>*Fujian Key Laboratory of Polymer Materials, Fuzhou 350007, P.R. China*

E-mail: yangfafu@fjnu.edu.cn

### Table of Contents

|     |                                                                      |    |
|-----|----------------------------------------------------------------------|----|
| 1   | General.....                                                         | S2 |
| 2   | The synthetic procedure of <b>6a</b> 、 <b>6b</b> and <b>6c</b> ..... | S2 |
| 2.1 | Synthesis of compound <b>2</b> .....                                 | S3 |
| 2.2 | Synthesis of compound <b>3</b> .....                                 | S3 |
| 2.3 | Synthesis of compound <b>5</b> .....                                 | S4 |
| 2.4 | Synthesis of compound <b>10</b> .....                                | S6 |
| 2.5 | Synthesis of compound <b>11</b> .....                                | S7 |

## 1. General

All chemicals were purchased from commercial suppliers and used without further purification. The other organic solvents and inorganic reagents were purified according to standard anhydrous methods before use. Distilled water was used in all experiments. TLC analysis was performed using pre-coated glass plates. IR spectra were recorded on a Perkin-Elmer PE-983 infrared spectrometer as KBr pellets with absorption in  $\text{cm}^{-1}$ .  $^1\text{H}$  NMR spectra were recorded in DMSO on a Bruker-ARX 600 instrument at  $30^\circ\text{C}$ . Chemical shifts are reported in ppm, using tetramethylsilane (TMS) as internal standard. ESI-MS spectra were obtained from DECAX-30000 LCQ Deca XP mass spectrometer. Elemental analyses were performed at Vario EL III Elemental Analyzer.

4-(prop-2-ynyloxy)benzaldehyde **4**, 3,4-bis(prop-2-ynyloxy)benzaldehyde **7** and 3,4,5-tris(prop-2-ynyloxy)benzaldehyde **9** were conveniently prepared by reacting 4-hydroxybenzaldehyde, 3,4-dihydroxybenzaldehyde **6** or 3,4,5-trihydroxybenzaldehyde **8** with 3-bromoprop-1-yne under  $\text{K}_2\text{CO}_3/\text{MeCN}$  system in yields of 87%, 86% and 80%, respectively (*Eur. J. Org. Chem.* 2008, 5723-5730).

## 2. The synthetic procedure of 6a, 6b and 6c

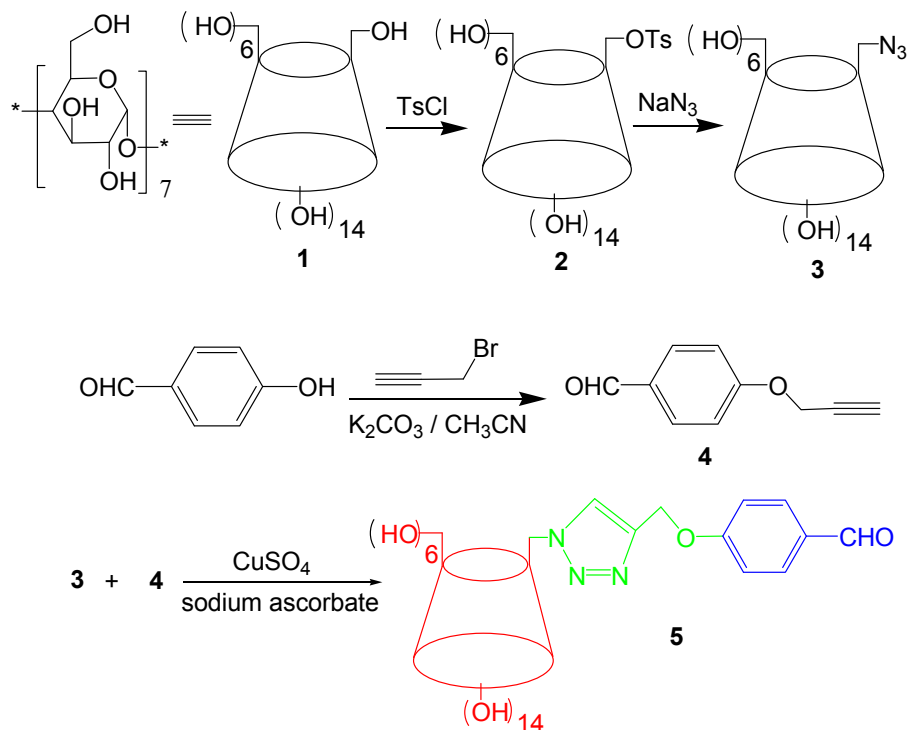

**Scheme 1** Synthetic route of compound **5**

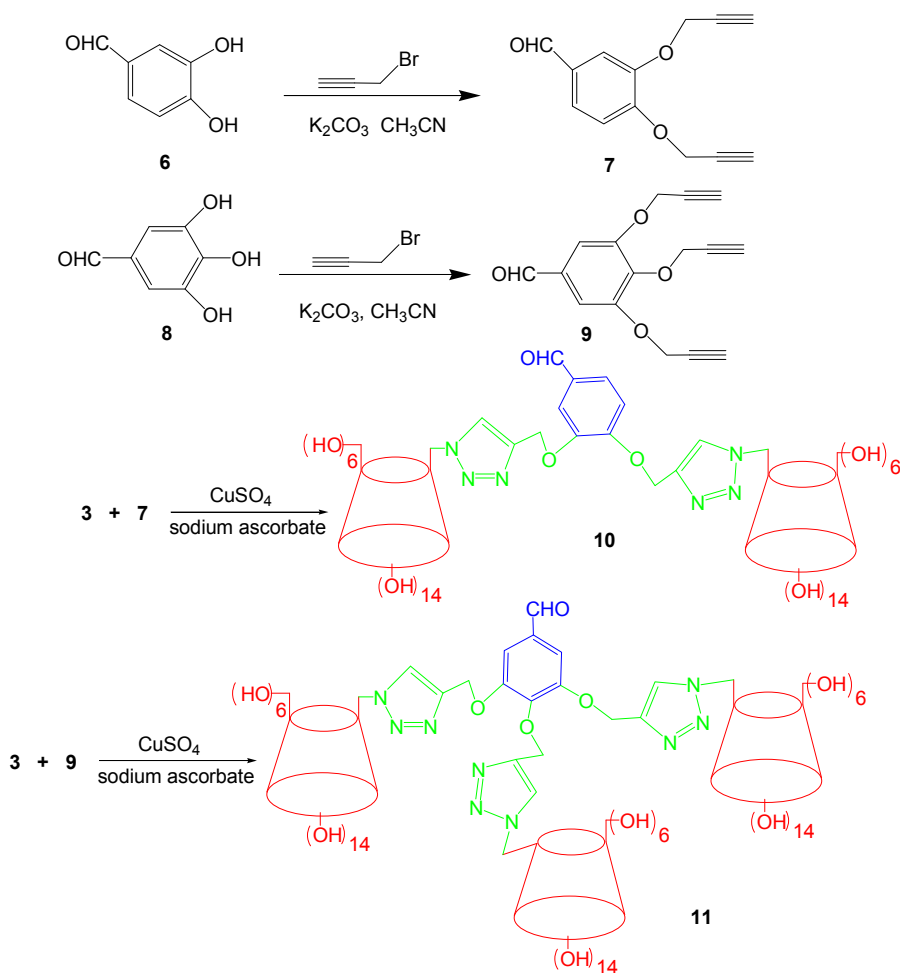

**Scheme 2** Synthetic route of compounds **10** and **11**

## 2.1 Synthesis of compound 2

According to the published method [*Journal of Chromatography A*, **2009**, 1216(2),257-63],  $\beta$ -CD (6.0 g, 5.3mmol) and NaOH (3.6 g, 0.09mol) were stirred in a water solution (120 mL) at 0-5°C. Then p-tolylsulfonyl chloride (TsCl, 1.2 g, 6.3mmol) was added into the solution at 0-5°C. After 5h at 0-5°C, the precipitate was removed by filtration. 10% HCl was added into the filtrate, and the pH was adjusted to pH=7. The mixture was kept in the refrigerator overnight to afford a white solid product. The white solid was recrystallized in hot water to afford 2.3 g of product (yield 38.3%). The characteristic data were in accordance with literature [*Journal of Chromatography A*, **2009**, 1216(2),257-63].

## 2.2 Synthesis of compound 3

According to the published method [*Journal of Controlled Release*, **2007**, 122(1): 54–62], the compound **2** (3g, 2.2mmol) and sodium azide (0.94g, 14.5mmol) dissolve into the DMF(20mL) and  $H_2O$  (3mL). The mixture was stirred at 80°C for 5h and then cooled to room temperature. The resulting solution was precipitated by acetone (80mL) to produce the raw azide product as a white powder. The crude product was recrystallized with little hot water and acetone to give white

compound **3** in yield of 65%. The characteristic data were in accordance with literature [*Journal of Controlled Release*, **2007**, 122(1): 54–62].

### 2.3 Synthesis of mono-CD aromatic aldehyde derivatives **5**

Compound **4** (0.16g, 1mmol) with compound **3** (1.16g, 1mmol) was carried out in DMF (35mL) in the presence of Cu<sup>I</sup> generated by the reduction of copper sulfate (0.28g, 1.1mmol) with sodium ascorbate (0.48g, 2.4mmol). The mixture was stirred at room temperature for 15 h. TLC detection indicated the disappearance of materials of compounds **3** and **4**. After reaction, most of the solvent was evaporated under reduced pressure and 20 mL of distilled water was added with vigorous stirring at room temperature. The mixture was stored in the refrigerator overnight and then the precipitate was collected by filtration. The precipitate was further purified by recrystallization in DMF/acetone for three times. Compound **5** was obtained as grey white solid in yield of 80%. Compound **5**: IR/cm<sup>-1</sup>: 3387, 2927, 1679, 1599, 1509, 1157, 1031, 756; <sup>1</sup>H NMR (400 MHz, DMSO-d<sub>6</sub>) δppm: 2.78~4.10 (m, 40H, CH and CH<sub>2</sub>), 4.25~4.68 (8H, OH and NCH<sub>2</sub>), 4.69~5.10 (m, 7H, CH), 5.23 (s, 2H, CH<sub>2</sub>O), 5.53~5.99 (m, 14H, OH), 7.24 (d, *J*=8.0Hz, 2H, ArH), 7.88 (d, *J*=8.0Hz, 2H, ArH), 8.22 (s, 3H, NCH), 9.87 (s, 1H, CHO). <sup>13</sup>C NMR (100 MHz, DMSO-d<sub>6</sub>) δppm: 191.9, 163.5, 142.4, 132.3, 130.3, 126.2, 115.6, 102.6, 101.7, 83.9, 82.5, 82.1, 81.4, 73.7, 73.6, 73.4, 73.1, 72.9, 72.6, 72.2, 70.5, 61.8, 60.4, 60.0, 59.5, 50.5. MS *m/z*(%): 1342.3(MNa<sup>+</sup>, 100). Anal. Calcd. For C<sub>52</sub>H<sub>77</sub>N<sub>3</sub>O<sub>36</sub>: C47.31, H5.88, N3.18; found C47.38, H5.82, N3.22%.

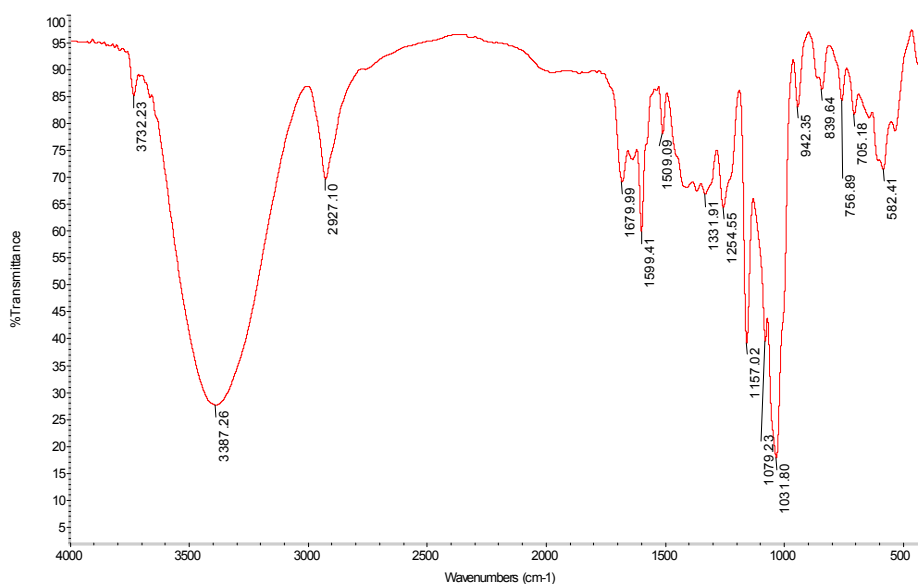

**Figure 1** The IR spectrum of compound **5**

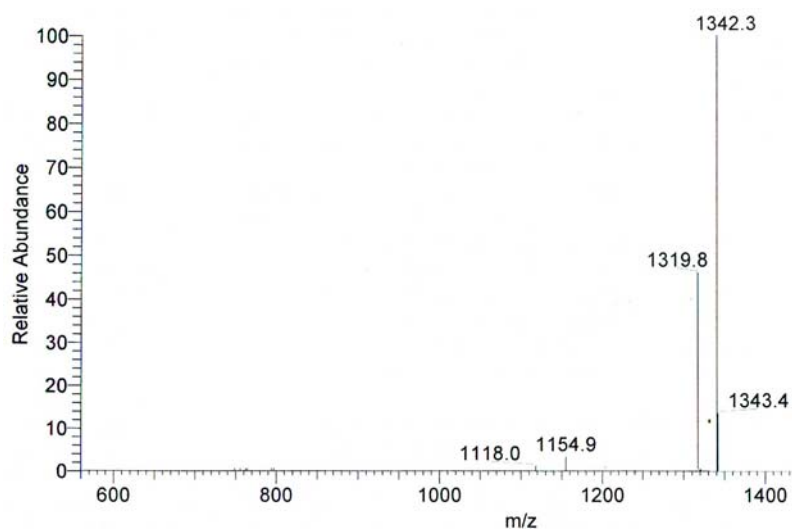

**Figure 2** ESI-MS spectra of mono CD aromatic aldehyde derivative **5**

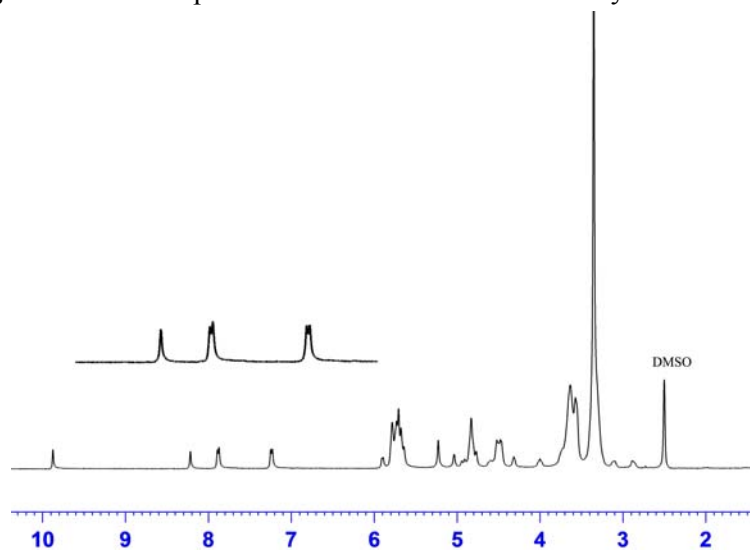

**Figure 3**  $^1\text{H}$  NMR spectrum of mono CD aromatic aldehyde derivative **5**

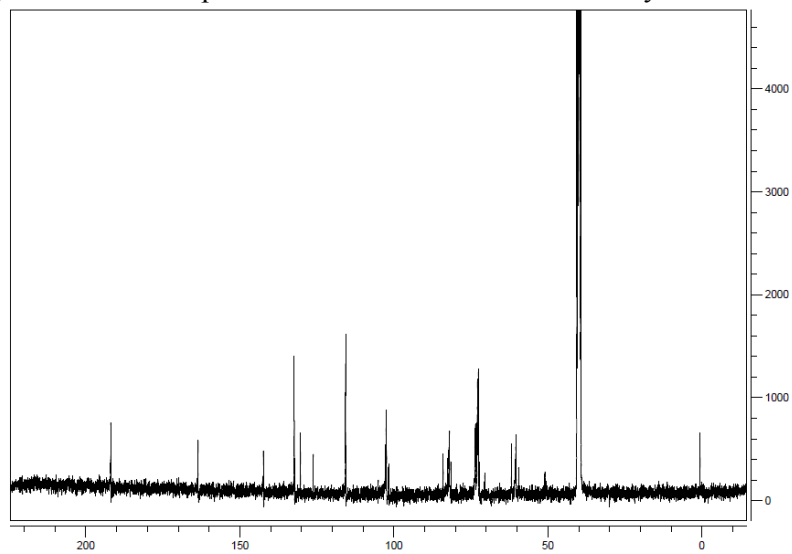

**Figure 4**  $^{13}\text{C}$  NMR spectrum of mono CD aromatic aldehyde derivative **5**

## 2.4 Synthesis of dimeric-CD aromatic aldehyde derivatives **10**

Compound **7** (0.107g, 0.5mmol) with compound **3** (1.16g, 1mmol) was carried out in DMF(35mL) in the presence of  $\text{Cu}^{\text{I}}$  generated by the reduction of copper sulfate (0.28g, 1.1mmol) with sodium ascorbate (0.48g, 2.4mmol). The mixture was stirred at 90°C for 48 h. TLC detection indicated the disappearance of materials of compounds **3** and **7**. After reaction, most of the solvent was evaporated under reduced pressure and 20 mL of distilled water was added with vigorous stirring at room temperature. The mixture was stored in the refrigerator overnight and then the precipitate was collected by filtration. The precipitate was further purified by recrystallization in DMF/acetone for three times. Compound **10** was obtained as grey white solid in yield of 78%. Compound **10**: IR/ $\text{cm}^{-1}$ : 3387, 2926, 1661, 1594, 1504, 1154, 1082, 756;  $^1\text{H}$  NMR (400 MHz,  $\text{DMSO-d}_6$ )  $\delta$ ppm: 2.68~3.98 (m, 114H), 4.18~4.67 (m, 6H), 4.68~4.99 (m, 6H), 5.48~6.05 (m, 16H), 7.24~8.28 (m, 5H, ArH and NCH), 9.88 (s, 1H, CHO).  $^{13}\text{C}$  NMR (100 MHz,  $\text{DMSO-d}_6$ )  $\delta$ ppm: 195.4, 165.2, 143.1, 134.1, 131.1, 128.4, 127.1, 118.3, 102.4, 100.4, 84.2, 81.9, 81.8, 81.1, 73.6, 73.5, 73.3, 73.1, 72.8, 72.5, 72.3, 70.2, 61.7, 60.6, 60.3, 51.1. MS  $m/z$ (%): 2556.4 ( $\text{MNa}^+$ , 100). Anal. Calcd. For  $\text{C}_{97}\text{H}_{148}\text{N}_6\text{O}_{71}$ : C45.97, H5.89, N3.32; found C46.02, H5.82, N3.26%.

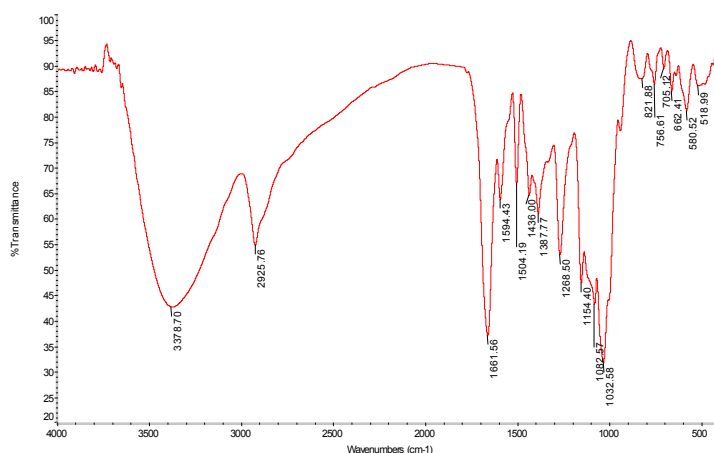

**Figure 5** The IR spectrum of compound **10**

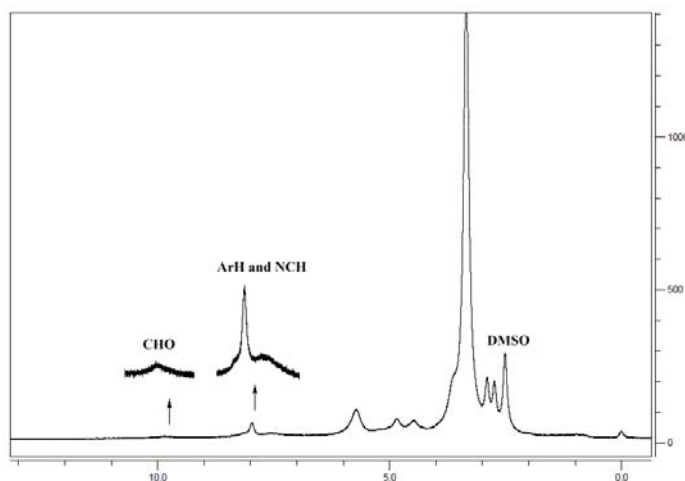

**Figure 6** The  $^1\text{H}$  NMR spectrum of Compound **10**

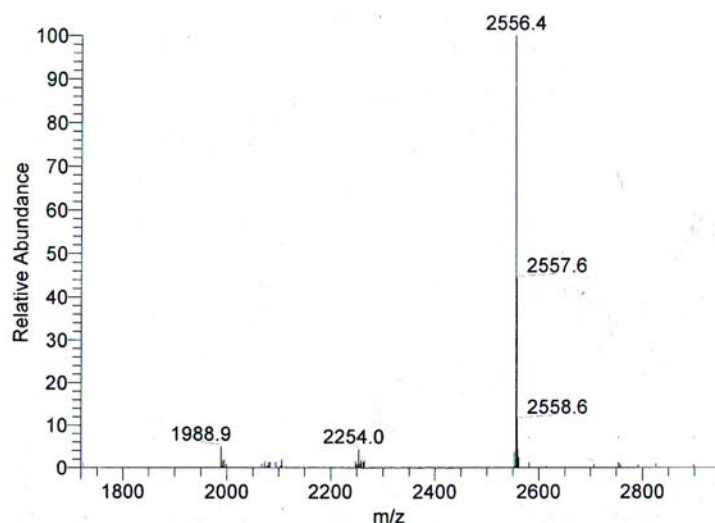

**Figure 7** ESI-MS spectra of dimeric CD aromatic aldehyde derivative **10**

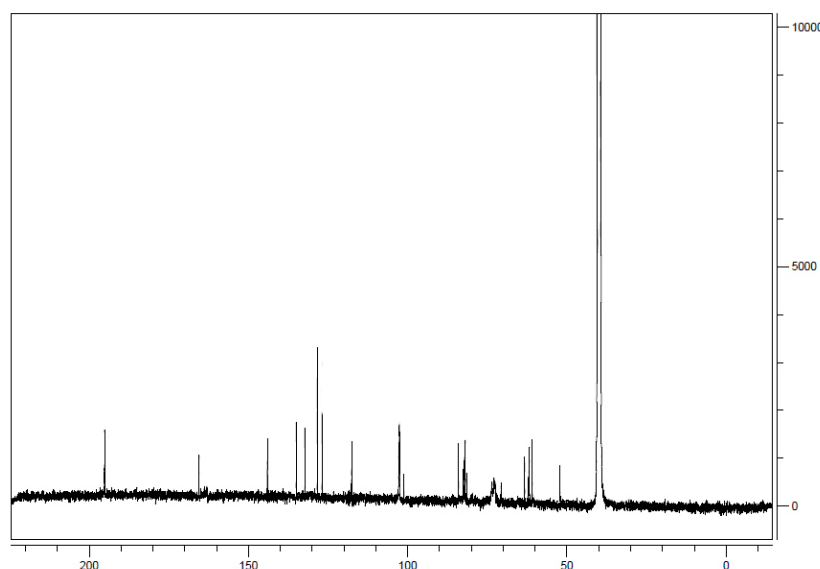

**Figure 8**  $^{13}\text{C}$  NMR spectrum of dimeric CD aromatic aldehyde derivative **10**

### 2.5 Synthesis of trimeric-CD aromatic aldehyde derivatives **11**

Compound **9** (0.090g, 0.34mmol) with compound **3** (1.16g, 1mmol) was carried out in DMF (35mL) in the presence of  $\text{Cu}^{\text{I}}$  generated by the reduction of copper sulfate (0.28g, 1.1mmol) with sodium ascorbate (0.48g, 2.4mmol). The mixture was stirred at  $90^{\circ}\text{C}$  for 60 h. TLC detection indicated the disappearance of materials of compounds **3** and **9**. After reaction, most of the solvent was evaporated under reduced pressure and 20 mL of distilled water was added with vigorous stirring at room temperature. The mixture was stored in the refrigerator overnight and then the precipitate was collected by filtration. The precipitate was further purified by recrystallization in DMF/acetone for three times. Compound **11** was obtained as grey white solid in yield of 75%. Compound **11**:  $\text{IR}/\text{cm}^{-1}$ : 3393, 2925, 1664, 1589,

1286, 1153, 1032, 758;  $^1\text{H}$  NMR (400 MHz, DMSO- $d_6$ )  $\delta$ ppm: 2.80~3.99 (m, 171H), 4.37~4.68 (m, 9H), 4.69~4.92(m, 9H), 5.39~5.98 (m, 24H), 7.89 (m, 5H, NCH and ArH), 9.89 (s, 1H, CHO).  $^{13}\text{C}$  NMR (100 MHz, DMSO- $d_6$ )  $\delta$ ppm: 188.2, 161.1, 143.5, 131.8, 130.0, 127.5, 126.3, 117.2, 103.2, 101.8, 101.4, 100.8, 83.3, 82.4, 81.0, 72.8, 72.6, 72.3, 71.9, 71.7, 71.4, 71.1, 70.6, 61.4, 60.7, 60.2, 50.4. MS  $m/z$ (%): 3774.3 ( $\text{MNa}^+$ , 100). Anal. Calcd. For  $\text{C}_{142}\text{H}_{219}\text{N}_9\text{O}_{106}$ : C45.50, H5.89, N3.32; found C45.56, H5.83, N3.25%.

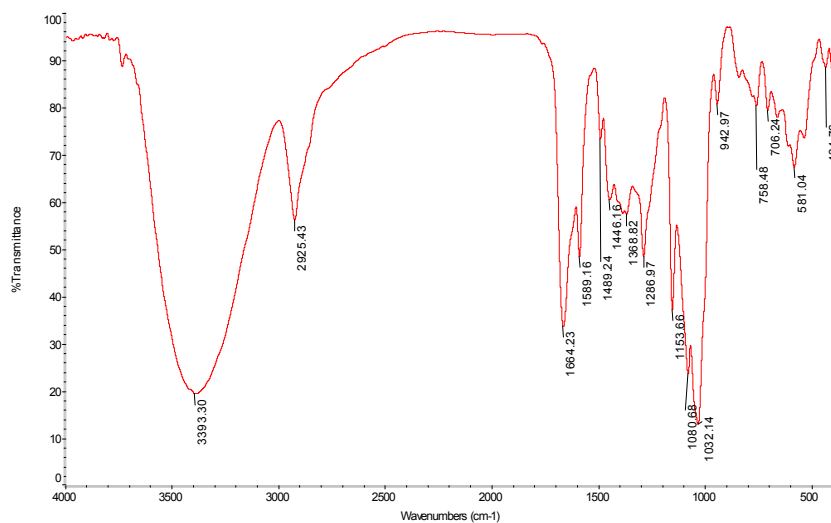

**Figure 9** The IR spectrum of compound **11**

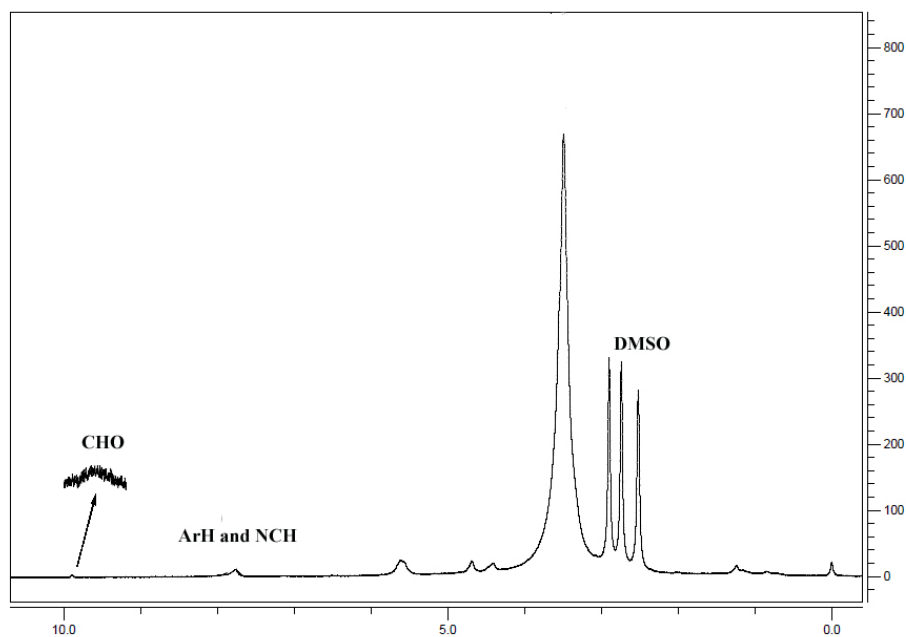

**Figure 10** The  $^1\text{H}$  NMR spectrum of compound **11**



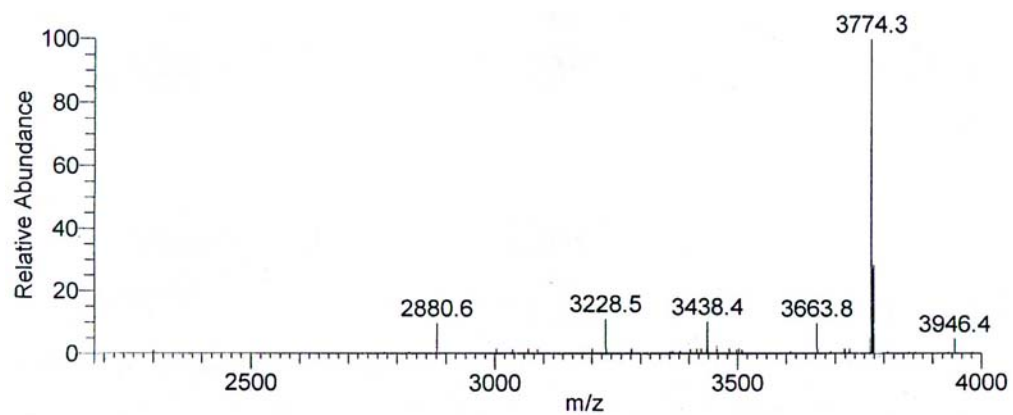

**Figure 11** ESI-MS spectra of trimeric CD aromatic aldehyde derivative **11**

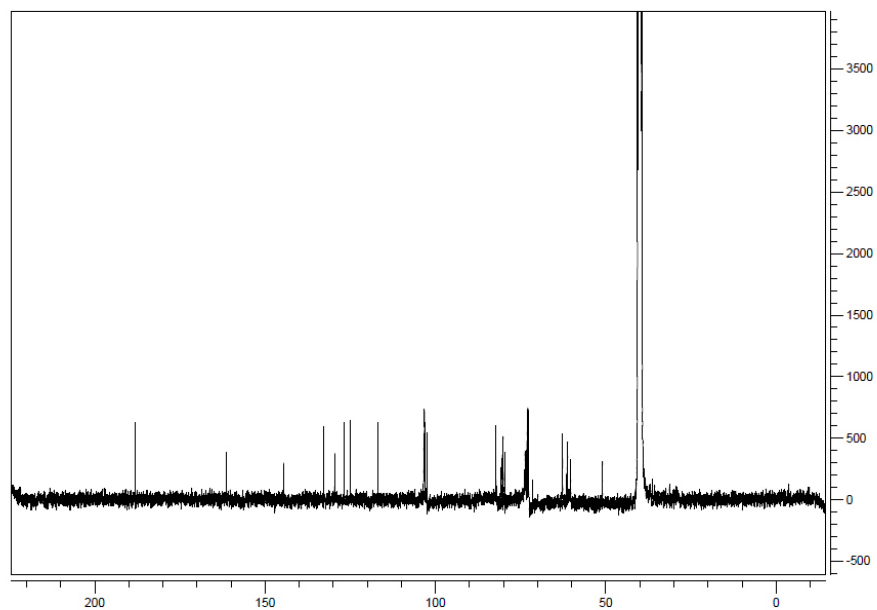

**Figure 12**  $^{13}\text{C}$  NMR spectrum of trimeric CD aromatic aldehyde derivative **11**
